# Supplementary material
Source: bioRxiv or medRxiv preprint supplement (https://www.biorxiv.org/highwire/filestream/30779/field_highwire_adjunct_files/3/106948-4.pdf)
Supplement: Supplementary file [file 106948-4.pdf]

**Supplementary Table S4.** Enrichment and depletion levels within KEGG circulatory system-associated genes

### Germ Layers

| Name     | Enrichment ratio | Observed | Expected    |
|----------|------------------|----------|-------------|
| endoderm | 1.075556146      | 79       | 73.45037292 |
| ectoderm | 1.025564975      | 98       | 95.55708548 |
| mesoderm | 0.985262238      | 97       | 98.45094664 |

### Organs

| Name                | Enrichment ratio | Observed | Expected    |
|---------------------|------------------|----------|-------------|
| appendix            | 5.586538462      | 3        | 0.537005164 |
| parathyroid         | 2.578402367      | 5        | 1.939185313 |
| heart valve         | 2.165217391      | 52       | 24.01606426 |
| aorta               | 2.052197802      | 12       | 5.847389558 |
| cerebrospinal fluid | 1.888407367      | 16       | 8.472748135 |
| meninges            | 1.779782165      | 24       | 13.48479633 |
| red blood cells     | 1.684383456      | 40       | 23.74756168 |
| adrenal gland       | 1.664075286      | 14       | 8.413080895 |
| placenta            | 1.646033654      | 11       | 6.682730924 |
| pancreas            | 1.627147125      | 25       | 15.3643144  |
| heart               | 1.504945055      | 66       | 43.85542169 |
| lymph vessels       | 1.478789593      | 3        | 2.028686173 |
| thyroid             | 1.433977787      | 8        | 5.578886976 |
| coagulation system  | 1.411815426      | 31       | 21.95754446 |
| abdominal wall      | 1.388744024      | 22       | 15.84165232 |
| sinuses             | 1.385092181      | 5        | 3.609868044 |
| gallbladder         | 1.38020362       | 7        | 5.071715433 |
| diaphragm           | 1.355557127      | 11       | 8.114744693 |
| tongue              | 1.347108565      | 17       | 12.61962134 |
| lung                | 1.34255931       | 60       | 44.69076305 |
| spinal cord         | 1.327494288      | 44       | 33.14515204 |
| hypothalamus        | 1.299194991      | 5        | 3.848537005 |
| ear                 | 1.284650297      | 76       | 59.16006885 |
| vocal cords         | 1.260911502      | 12       | 9.516924842 |

|                           |             |    |             |
|---------------------------|-------------|----|-------------|
| chin                      | 1.257575758 | 26 | 20.6746988  |
| blood vessels             | 1.253631562 | 61 | 48.65863454 |
| esophagus                 | 1.251755506 | 27 | 21.5697074  |
| duodenum                  | 1.234919028 | 7  | 5.668387837 |
| stomach                   | 1.23115658  | 31 | 25.17957544 |
| lymph nodes               | 1.228453484 | 7  | 5.698221457 |
| blood                     | 1.217497599 | 64 | 52.56683878 |
| biliary tract             | 1.20889029  | 11 | 9.099254159 |
| pharynx                   | 1.205314805 | 21 | 17.42283419 |
| lower limb                | 1.190239004 | 68 | 57.13138267 |
| upper limb                | 1.183902191 | 64 | 54.05851979 |
| cranial nerve             | 1.166460427 | 53 | 45.43660356 |
| forehead                  | 1.155835544 | 28 | 24.2248996  |
| bronchus                  | 1.14400105  | 10 | 8.741250717 |
| lacrimial apparatus       | 1.129861711 | 3  | 2.655192197 |
| salivary gland            | 1.129861711 | 6  | 5.310384395 |
| peripheral nerve          | 1.122882285 | 47 | 41.85656913 |
| rectum                    | 1.122653662 | 14 | 12.47045324 |
| uterus                    | 1.115758028 | 24 | 21.51004016 |
| cheek                     | 1.112943209 | 17 | 15.27481354 |
| sweat gland               | 1.110576923 | 11 | 9.904761905 |
| cerebellum                | 1.104710121 | 38 | 34.39816408 |
| chest wall                | 1.091165193 | 32 | 29.32644865 |
| face                      | 1.067491426 | 55 | 51.52266208 |
| head                      | 1.052615687 | 96 | 91.20137694 |
| peripheral nervous system | 1.047475962 | 64 | 61.09925416 |
| brain                     | 1.045223325 | 87 | 83.23580034 |
| sternum                   | 1.044964029 | 26 | 24.88123924 |
| larynx                    | 1.038206263 | 14 | 13.48479633 |
| eyelid                    | 1.025791041 | 34 | 33.14515204 |
| vas deferens              | 0.966900888 | 3  | 3.1026965   |
| rib                       | 0.965972068 | 30 | 31.05679862 |
| rib cage                  | 0.965972068 | 30 | 31.05679862 |

|                   |             |    |             |
|-------------------|-------------|----|-------------|
| knee              | 0.964806085 | 31 | 32.13080895 |
| kidney            | 0.962850435 | 32 | 33.2346529  |
| eye               | 0.960791636 | 62 | 64.53012048 |
| hair              | 0.954769544 | 28 | 29.32644865 |
| mouth             | 0.950767947 | 51 | 53.64084911 |
| inner ear         | 0.94610732  | 7  | 7.398737808 |
| foot              | 0.939791517 | 48 | 51.07515777 |
| fallopian tube    | 0.939791517 | 3  | 3.192197361 |
| nose              | 0.936781995 | 32 | 34.15949512 |
| pituitary gland   | 0.933250045 | 12 | 12.8582903  |
| neck              | 0.931770863 | 38 | 40.78255881 |
| ankle             | 0.926799007 | 30 | 32.36947791 |
| hip               | 0.926799007 | 30 | 32.36947791 |
| elbow             | 0.926651756 | 29 | 31.29546758 |
| wrist             | 0.921381699 | 29 | 31.47446931 |
| pelvis            | 0.911674454 | 30 | 32.90648308 |
| toes              | 0.909612775 | 40 | 43.97475617 |
| hand              | 0.908716053 | 44 | 48.41996558 |
| fingers           | 0.900582216 | 41 | 45.52610442 |
| digit             | 0.897836538 | 42 | 46.77911647 |
| white blood cells | 0.893846154 | 26 | 29.08777969 |
| vertebrae         | 0.887087393 | 28 | 31.56397017 |
| skull             | 0.886283204 | 50 | 56.41537579 |
| shoulder          | 0.872583207 | 29 | 33.2346529  |
| lips              | 0.871658483 | 22 | 25.23924269 |
| skin              | 0.864914511 | 57 | 65.90246701 |
| large intestine   | 0.86474674  | 21 | 24.28456684 |
| intestine         | 0.863008001 | 25 | 28.96844521 |
| spinal column     | 0.838729635 | 28 | 33.383821   |
| scalp             | 0.82968393  | 5  | 6.026391279 |
| arm               | 0.828044238 | 25 | 30.19162364 |
| teeth             | 0.817542214 | 17 | 20.79403328 |
| scapula           | 0.809231747 | 19 | 23.47905909 |

|                 |             |    |             |
|-----------------|-------------|----|-------------|
| small intestine | 0.799196246 | 17 | 21.2713712  |
| liver           | 0.798076923 | 23 | 28.81927711 |
| mandible        | 0.793354574 | 32 | 40.3350545  |
| maxilla         | 0.792768207 | 32 | 40.36488812 |
| jaw             | 0.787529651 | 32 | 40.63339071 |
| anus            | 0.779516995 | 5  | 6.414228342 |
| trachea         | 0.776507277 | 6  | 7.726907631 |
| nail            | 0.768789697 | 10 | 13.00745841 |
| spleen          | 0.764961698 | 11 | 14.37980493 |
| clavicle        | 0.72867893  | 18 | 24.70223752 |
| ovary           | 0.719296798 | 10 | 13.90246701 |
| humerus         | 0.714865111 | 18 | 25.17957544 |
| shin            | 0.702941926 | 19 | 27.0292599  |
| ulna            | 0.697462574 | 17 | 24.3740677  |
| testis          | 0.688196767 | 17 | 24.70223752 |
| fibula          | 0.687573964 | 16 | 23.27022375 |
| forearm         | 0.686869483 | 20 | 29.11761331 |
| thigh           | 0.68186872  | 19 | 27.86460126 |
| tibia           | 0.674600871 | 16 | 23.71772806 |
| femur           | 0.669596854 | 17 | 25.38841079 |
| bone marrow     | 0.652442448 | 8  | 12.2616179  |
| radius          | 0.644600592 | 16 | 24.821572   |
| ureter          | 0.635101215 | 9  | 14.17096959 |
| outer ear       | 0.586769904 | 16 | 27.26792886 |
| breast          | 0.58041958  | 8  | 13.78313253 |
| prostate        | 0.576261847 | 6  | 10.41193345 |
| penis           | 0.52048495  | 10 | 19.21285141 |
| vagina          | 0.520254136 | 7  | 13.45496271 |
| urethra         | 0.478846154 | 5  | 10.44176707 |
| vulva           | 0.47477664  | 5  | 10.53126793 |
| olfactory bulb  | 0.443963321 | 2  | 4.504876649 |
| epiglottis      | 0.438159879 | 2  | 4.56454389  |
| urinary bladder | 0.429733728 | 6  | 13.96213425 |

|            |             |   |             |
|------------|-------------|---|-------------|
| middle ear | 0.346989967 | 5 | 14.40963855 |
| thymus     | 0           | 0 | 2.237521515 |

### Body Regions

| Name          | Enrichment ratio | Observed | Expected    |
|---------------|------------------|----------|-------------|
| thorax        | 1.249869622      | 88       | 70.40734366 |
| limbs         | 1.142701049      | 69       | 60.38324727 |
| head and neck | 1.061406927      | 100      | 94.21457258 |
| non-specific  | 1.012856832      | 96       | 94.78141136 |
| abdomen       | 0.933404735      | 56       | 59.99541021 |
| pelvis        | 0.802322013      | 45       | 56.08720597 |

### Body Systems

| Name            | Enrichment ratio | Observed | Expected    |
|-----------------|------------------|----------|-------------|
| respiratory     | 1.215428198      | 64       | 52.65633964 |
| cardiovascular  | 1.152523694      | 72       | 62.47160069 |
| skeletal muscle | 1.085755814      | 78       | 71.83935743 |
| endocrine       | 1.041449057      | 27       | 25.92541595 |
| nervous         | 1.040407973      | 92       | 88.42685026 |
| digestive       | 0.930132817      | 54       | 58.0562249  |
| urinary         | 0.901747177      | 35       | 38.81353987 |
| reproductive    | 0.888272678      | 34       | 38.27653471 |
| integumentary   | 0.856815947      | 58       | 67.69248422 |
| skeleton        | 0.854556213      | 58       | 67.87148594 |
| immune          | 0.803543203      | 35       | 43.55708548 |
| lymphatic       | 0.522254304      | 11       | 21.06253586 |

| P-value     | FDR         |
|-------------|-------------|
| 0.118410291 | 0.309752542 |
| 0.206501695 | 0.309752542 |
| 0.253529518 | 0.760588553 |

| P-value     | FDR         |
|-------------|-------------|
| 0.043543819 | 0.320175141 |
| 0.054283093 | 0.37040878  |
| 1.64927E-09 | 2.06158E-07 |
| 0.013622756 | 0.141903703 |
| 0.00923515  | 0.128265974 |
| 0.002862445 | 0.059634279 |
| 0.000206296 | 0.008595673 |
| 0.036370122 | 0.284141578 |
| 0.063135521 | 0.394597003 |
| 0.007272685 | 0.128265974 |
| 8.16797E-06 | 0.000510498 |
| 0.282218091 | 0.80938992  |
| 0.168726101 | 0.727267679 |
| 0.019632197 | 0.17528747  |
| 0.056302135 | 0.37040878  |
| 0.249912211 | 0.80938992  |
| 0.209689027 | 0.770915539 |
| 0.161435749 | 0.720695307 |
| 0.106592127 | 0.512462149 |
| 0.001457812 | 0.03644531  |
| 0.013506404 | 0.141903703 |
| 0.286495329 | 0.80938992  |
| 0.000397046 | 0.012407697 |
| 0.208023184 | 0.770915539 |

|             |             |
|-------------|-------------|
| 0.102831946 | 0.512462149 |
| 0.008319013 | 0.128265974 |
| 0.101682805 | 0.512462149 |
| 0.287292969 | 0.80938992  |
| 0.097414992 | 0.512462149 |
| 0.291380371 | 0.80938992  |
| 0.013113847 | 0.141903703 |
| 0.258522869 | 0.80938992  |
| 0.179303749 | 0.741932148 |
| 0.016526053 | 0.158904356 |
| 0.026466445 | 0.220553709 |
| 0.070016896 | 0.416767238 |
| 0.19360819  | 0.756281993 |
| 0.32454176  | 0.845160834 |
| 0.399723613 | 0.960874071 |
| 0.370122615 | 0.925306539 |
| 0.154401934 | 0.714823768 |
| 0.3186038   | 0.845160834 |
| 0.272707644 | 0.80938992  |
| 0.313240911 | 0.845160834 |
| 0.350666324 | 0.894556948 |
| 0.227599027 | 0.80938992  |
| 0.279431423 | 0.80938992  |
| 0.249337374 | 0.80938992  |
| 0.080207321 | 0.455723412 |
| 0.284455194 | 0.80938992  |
| 0.183999173 | 0.741932148 |
| 0.393130266 | 0.960874071 |
| 0.428969596 | 0.992985176 |
| 0.424454903 | 0.992985176 |
| 0.485259902 | 0.99796848  |
| 0.41469781  | 0.762312151 |
| 0.41469781  | 0.762312151 |

|             |             |
|-------------|-------------|
| 0.409035831 | 0.762312151 |
| 0.400997338 | 0.762312151 |
| 0.300945041 | 0.653908243 |
| 0.390594358 | 0.762312151 |
| 0.300171877 | 0.653908243 |
| 0.459307035 | 0.832077961 |
| 0.27135039  | 0.652284592 |
| 0.488481883 | 0.872289076 |
| 0.327814411 | 0.671750842 |
| 0.411522919 | 0.762312151 |
| 0.287908679 | 0.653908243 |
| 0.3096376   | 0.653908243 |
| 0.3096376   | 0.653908243 |
| 0.313875957 | 0.653908243 |
| 0.300388932 | 0.653908243 |
| 0.270669434 | 0.652284592 |
| 0.213312212 | 0.592533922 |
| 0.190206652 | 0.544048615 |
| 0.183296111 | 0.544048615 |
| 0.170732108 | 0.544048615 |
| 0.250702963 | 0.639548376 |
| 0.223153983 | 0.595158535 |
| 0.10122603  | 0.433188079 |
| 0.184956012 | 0.544048615 |
| 0.230007484 | 0.598977823 |
| 0.034866562 | 0.255297196 |
| 0.223779609 | 0.595158535 |
| 0.191505112 | 0.544048615 |
| 0.125942512 | 0.47002272  |
| 0.351799522 | 0.709273229 |
| 0.12784618  | 0.47002272  |
| 0.174949169 | 0.544048615 |
| 0.14402991  | 0.51040921  |



|             |             |
|-------------|-------------|
| 0.146997852 | 0.51040921  |
| 0.097113336 | 0.433188079 |
| 0.043582835 | 0.255297196 |
| 0.043033177 | 0.255297196 |
| 0.03833788  | 0.255297196 |
| 0.296104073 | 0.653908243 |
| 0.269295447 | 0.652284592 |
| 0.187013115 | 0.544048615 |
| 0.167578169 | 0.544048615 |
| 0.055985174 | 0.291589447 |
| 0.126772725 | 0.47002272  |
| 0.044932307 | 0.255297196 |
| 0.0316356   | 0.255297196 |
| 0.038632695 | 0.255297196 |
| 0.032870326 | 0.255297196 |
| 0.038109432 | 0.255297196 |
| 0.019438839 | 0.255297196 |
| 0.020783936 | 0.255297196 |
| 0.030438099 | 0.255297196 |
| 0.023166692 | 0.255297196 |
| 0.091407967 | 0.42318503  |
| 0.016967589 | 0.255297196 |
| 0.062513114 | 0.312565571 |
| 0.004009606 | 0.198507469 |
| 0.039446963 | 0.255297196 |
| 0.066672687 | 0.320541763 |
| 0.006352239 | 0.198507469 |
| 0.022276501 | 0.255297196 |
| 0.028939149 | 0.255297196 |
| 0.027231284 | 0.255297196 |
| 0.108623943 | 0.437999769 |
| 0.103965139 | 0.433188079 |
| 0.006280187 | 0.198507469 |

|             |             |
|-------------|-------------|
| 0.001460049 | 0.18250616  |
| 0.050309391 | 0.273420605 |

| P-value     | FDR         |
|-------------|-------------|
| 6.83607E-05 | 0.000410164 |
| 0.044248748 | 0.088497495 |
| 0.027223402 | 0.081670206 |
| 0.35345295  | 0.530179425 |
| 0.211114753 | 0.633344259 |
| 0.013887309 | 0.083323855 |

| P-value     | FDR         |
|-------------|-------------|
| 0.013706713 | 0.164480558 |
| 0.028529293 | 0.171175759 |
| 0.097256817 | 0.389027267 |
| 0.398468144 | 0.956323546 |
| 0.170887608 | 0.512662823 |
| 0.208925165 | 0.374478982 |
| 0.218446073 | 0.374478982 |
| 0.190496074 | 0.374478982 |
| 0.023330483 | 0.093321931 |
| 0.021312647 | 0.093321931 |
| 0.041741826 | 0.125225477 |
| 0.004297075 | 0.051564905 |

**Supplementary Table S4.** Enrichment and depletion levels within KEGG immune system-associated genes

### Germ Layers

| Name     | Enrichment ratio | Observed | Expected    |
|----------|------------------|----------|-------------|
| endoderm | 1.150436637      | 91       | 79.10040161 |
| mesoderm | 1.018636364      | 108      | 106.0240964 |
| ectoderm | 0.932875429      | 96       | 102.9076305 |

### Organs

| Name               | Enrichment ratio | Observed | Expected    |
|--------------------|------------------|----------|-------------|
| sinuses            | 5.144628099      | 20       | 3.887550201 |
| lymph nodes        | 4.888743455      | 30       | 6.136546185 |
| bone marrow        | 4.089416058      | 54       | 13.20481928 |
| lymph vessels      | 3.661764706      | 8        | 2.184738956 |
| appendix           | 3.458333333      | 2        | 0.578313253 |
| bronchus           | 2.549488055      | 24       | 9.413654618 |
| white blood cells  | 2.394230769      | 75       | 31.3253012  |
| aorta              | 2.382015306      | 15       | 6.297188755 |
| anus               | 2.31627907       | 16       | 6.907630522 |
| spleen             | 2.260114108      | 35       | 15.48594378 |
| thyroid            | 2.163770053      | 13       | 6.008032129 |
| hypothalamus       | 1.930232558      | 8        | 4.144578313 |
| meninges           | 1.859236726      | 27       | 14.52208835 |
| scalp              | 1.849009901      | 12       | 6.489959839 |
| small intestine    | 1.789796634      | 41       | 22.90763052 |
| rectum             | 1.78708134       | 24       | 13.42971888 |
| large intestine    | 1.758906634      | 46       | 26.15261044 |
| placenta           | 1.667410714      | 12       | 7.196787149 |
| nail               | 1.641915138      | 23       | 14.00803213 |
| blood              | 1.589812713      | 90       | 56.61044177 |
| coagulation system | 1.56470788       | 37       | 23.64658635 |
| intestine          | 1.506565396      | 47       | 31.19678715 |
| knee               | 1.473885794      | 51       | 34.60240964 |
| elbow              | 1.453884652      | 49       | 33.70281124 |
| wrist              | 1.445616114      | 49       | 33.89558233 |
| ankle              | 1.434331797      | 50       | 34.85943775 |

|                 |             |    |             |
|-----------------|-------------|----|-------------|
| middle ear      | 1.417701863 | 22 | 15.51807229 |
| hip             | 1.405645161 | 49 | 34.85943775 |
| salivary gland  | 1.398876404 | 8  | 5.718875502 |
| shoulder        | 1.396992819 | 50 | 35.79116466 |
| lung            | 1.392106142 | 67 | 48.12851406 |
| trachea         | 1.321911197 | 11 | 8.321285141 |
| sweat gland     | 1.3125      | 14 | 10.66666667 |
| toes            | 1.266960651 | 60 | 47.35742972 |
| liver           | 1.256599379 | 39 | 31.03614458 |
| stomach         | 1.253850711 | 34 | 27.11646586 |
| tongue          | 1.250886525 | 17 | 13.59036145 |
| teeth           | 1.25035868  | 28 | 22.3935743  |
| digit           | 1.230707908 | 62 | 50.37751004 |
| cheek           | 1.215820313 | 20 | 16.4497992  |
| fingers         | 1.203391219 | 59 | 49.02811245 |
| hand            | 1.169824399 | 61 | 52.14457831 |
| foot            | 1.163551402 | 64 | 55.00401606 |
| esophagus       | 1.162344398 | 27 | 23.22891566 |
| pituitary gland | 1.155452436 | 16 | 13.84738956 |
| scapula         | 1.146918679 | 29 | 25.28514056 |
| uterus          | 1.122399445 | 26 | 23.16465863 |
| fibula          | 1.117307692 | 28 | 25.06024096 |
| humerus         | 1.106338863 | 30 | 27.11646586 |
| lower limb      | 1.105221932 | 68 | 61.52610442 |
| ulna            | 1.104804162 | 29 | 26.24899598 |
| adrenal gland   | 1.103723404 | 10 | 9.060240964 |
| upper limb      | 1.099337748 | 64 | 58.21686747 |
| gallbladder     | 1.098529412 | 6  | 5.46184739  |
| tibia           | 1.096226415 | 28 | 25.54216867 |
| neck            | 1.09290417  | 48 | 43.91967871 |
| clavicle        | 1.090126812 | 29 | 26.60240964 |
| skin            | 1.084936623 | 77 | 70.97188755 |
| radius          | 1.084885817 | 29 | 26.73092369 |
| sternum         | 1.082284173 | 29 | 26.79518072 |
| mouth           | 1.073275862 | 62 | 57.76706827 |
| forehead        | 1.073275862 | 28 | 26.08835341 |

|                     |             |    |             |
|---------------------|-------------|----|-------------|
| blood vessels       | 1.068669528 | 56 | 52.40160643 |
| lips                | 1.066932624 | 29 | 27.18072289 |
| shin                | 1.064983444 | 31 | 29.10843373 |
| chest wall          | 1.044888098 | 33 | 31.58232932 |
| thigh               | 1.033056745 | 31 | 30.00803213 |
| chin                | 1.033008658 | 23 | 22.26506024 |
| face                | 1.027287203 | 57 | 55.48594378 |
| femur               | 1.024089307 | 28 | 27.34136546 |
| forearm             | 1.020491803 | 32 | 31.35742972 |
| rib                 | 1.016570605 | 34 | 33.44578313 |
| rib cage            | 1.016570605 | 34 | 33.44578313 |
| mandible            | 0.989922337 | 43 | 43.437751   |
| maxilla             | 0.989190687 | 43 | 43.46987952 |
| skull               | 0.987572713 | 60 | 60.75502008 |
| cerebrospinal fluid | 0.986355634 | 9  | 9.124497992 |
| arm                 | 0.984189723 | 32 | 32.51405622 |
| jaw                 | 0.982654185 | 43 | 43.75903614 |
| nose                | 0.97860262  | 36 | 36.78714859 |
| parathyroid         | 0.957692308 | 2  | 2.088353414 |
| head                | 0.9468842   | 93 | 98.21686747 |
| breast              | 0.943181818 | 14 | 14.84337349 |
| vertebrae           | 0.941398866 | 32 | 33.99196787 |
| red blood cells     | 0.938442211 | 24 | 25.57429719 |
| biliary tract       | 0.918442623 | 9  | 9.799196787 |
| hair                | 0.918234995 | 29 | 31.58232932 |
| spinal column       | 0.917895442 | 33 | 35.95180723 |
| pelvis              | 0.90299184  | 32 | 35.437751   |
| vas deferens        | 0.897836538 | 3  | 3.341365462 |
| abdominal wall      | 0.879237288 | 15 | 17.06024096 |
| fallopian tube      | 0.872663551 | 3  | 3.437751004 |
| peripheral nerve    | 0.865199572 | 39 | 45.07630522 |
| ear                 | 0.86327534  | 55 | 63.71084337 |
| brain               | 0.859005376 | 77 | 89.63855422 |
| larynx              | 0.826327434 | 12 | 14.52208835 |
| duodenum            | 0.819078947 | 5  | 6.104417671 |
| epiglottis          | 0.81372549  | 4  | 4.915662651 |

|                           |             |    |             |
|---------------------------|-------------|----|-------------|
| urethra                   | 0.800357143 | 9  | 11.24497992 |
| eye                       | 0.791435506 | 55 | 69.4939759  |
| testis                    | 0.789402174 | 21 | 26.60240964 |
| ureter                    | 0.786315789 | 12 | 15.26104418 |
| outer ear                 | 0.783233042 | 23 | 29.36546185 |
| heart                     | 0.762244898 | 36 | 47.22891566 |
| kidney                    | 0.754376122 | 27 | 35.79116466 |
| heart valve               | 0.734627329 | 19 | 25.86345382 |
| urinary bladder           | 0.731570513 | 11 | 15.03614458 |
| pancreas                  | 0.725242718 | 12 | 16.54618474 |
| peripheral nervous system | 0.714294434 | 47 | 65.79919679 |
| pharynx                   | 0.692851027 | 13 | 18.76305221 |
| eyelid                    | 0.672367237 | 24 | 35.69477912 |
| cranial nerve             | 0.633535785 | 31 | 48.93172691 |
| vagina                    | 0.621119734 | 9  | 14.48995984 |
| cerebellum                | 0.620880312 | 23 | 37.04417671 |
| spinal cord               | 0.616336634 | 22 | 35.69477912 |
| ovary                     | 0.601126609 | 9  | 14.97188755 |
| vocal cords               | 0.585423197 | 6  | 10.24899598 |
| penis                     | 0.483307453 | 10 | 20.69076305 |
| diaphragm                 | 0.457720588 | 4  | 8.738955823 |
| vulva                     | 0.440864023 | 5  | 11.34136546 |
| thymus                    | 0.415       | 1  | 2.409638554 |
| olfactory bulb            | 0.412251656 | 2  | 4.851405622 |
| inner ear                 | 0.376512097 | 3  | 7.967871486 |
| prostate                  | 0.356733524 | 4  | 11.21285141 |
| lacrimal apparatus        | 0.349719101 | 1  | 2.859437751 |

## Body Regions

| Name          | Enrichment ratio | Observed | Expected    |
|---------------|------------------|----------|-------------|
| limbs         | 1.045701581      | 68       | 65.02811245 |
| thorax        | 1.041896186      | 79       | 75.82329317 |
| non-specific  | 1.038479698      | 106      | 102.0722892 |
| abdomen       | 1.021506713      | 66       | 64.61044177 |
| head and neck | 0.946168461      | 96       | 101.4618474 |
| pelvis        | 0.894015957      | 54       | 60.40160643 |

## Body Systems

| Name            | Enrichment ratio | Observed | Expected    |
|-----------------|------------------|----------|-------------|
| lymphatic       | 2.777443343      | 63       | 22.68273092 |
| immune          | 1.748116438      | 82       | 46.90763052 |
| respiratory     | 1.35786119       | 77       | 56.70682731 |
| digestive       | 1.119604317      | 70       | 62.52208835 |
| reproductive    | 1.067420109      | 44       | 41.22088353 |
| integumentary   | 1.056247245      | 77       | 72.89959839 |
| skeleton        | 0.971373626      | 71       | 73.09236948 |
| cardiovascular  | 0.921561605      | 62       | 67.27710843 |
| nervous         | 0.903087045      | 86       | 95.22891566 |
| endocrine       | 0.859608746      | 24       | 27.91967871 |
| skeletal muscle | 0.736762874      | 57       | 77.36546185 |
| urinary         | 0.669869331      | 28       | 41.79919679 |

| P-value     | FDR         |
|-------------|-------------|
| 0.006061024 | 0.018183073 |
| 0.224823954 | 0.33723593  |
| 0.012645156 | 0.037935469 |

| P-value      | FDR         |
|--------------|-------------|
| 1.92273E-09  | 4.80682E-08 |
| -3.95462E-12 | 4.94E-10    |
| -9.14824E-14 | 5.72E-12    |
| 0.002424586  | 0.015153665 |
| 0.185097245  | 0.502981644 |
| 1.58729E-05  | 0.000283445 |
| 2.04071E-12  | 8.50295E-11 |
| 0.00156751   | 0.010885486 |
| 0.001416832  | 0.010742482 |
| 1.45251E-06  | 3.02606E-05 |
| 0.006997779  | 0.036446767 |
| 0.054168589  | 0.193459248 |
| 0.000814966  | 0.007836216 |
| 0.026913171  | 0.120148085 |
| 4.69915E-05  | 0.000652659 |
| 0.002822076  | 0.01533737  |
| 1.86965E-05  | 0.000292132 |
| 0.050194088  | 0.186707071 |
| 0.009437435  | 0.045372283 |
| 5.53852E-11  | 1.73079E-09 |
| 0.001860791  | 0.012242044 |
| 0.000744896  | 0.007759334 |
| 0.000638871  | 0.007259895 |
| 0.001236537  | 0.010742482 |
| 0.001413391  | 0.010742482 |
| 0.001460978  | 0.010742482 |



|             |             |
|-------------|-------------|
| 0.047591899 | 0.186707071 |
| 0.002683023 | 0.015321441 |
| 0.183770296 | 0.502981644 |
| 0.002696574 | 0.015321441 |
| 0.000195823 | 0.002447787 |
| 0.180350045 | 0.502981644 |
| 0.15341377  | 0.467724908 |
| 0.00861497  | 0.043074852 |
| 0.050784323 | 0.186707071 |
| 0.069940456 | 0.242848807 |
| 0.169681309 | 0.502981644 |
| 0.099243471 | 0.335281997 |
| 0.014544076 | 0.067333684 |
| 0.177257184 | 0.502981644 |
| 0.030266487 | 0.130458997 |
| 0.048221821 | 0.186707071 |
| 0.045733872 | 0.186707071 |
| 0.192482165 | 0.511920651 |
| 0.268299022 | 0.599959718 |
| 0.202541132 | 0.527450864 |
| 0.253925833 | 0.598881682 |
| 0.252314541 | 0.598881682 |
| 0.261725539 | 0.599959718 |
| 0.110800329 | 0.364474768 |
| 0.268781954 | 0.599959718 |
| 0.363992265 | 0.710922392 |
| 0.138573777 | 0.433043053 |
| 0.39340297  | 0.733960764 |
| 0.288178074 | 0.63196946  |
| 0.215756722 | 0.539391805 |
| 0.295237411 | 0.636287524 |
| 0.119923028 | 0.384368678 |
| 0.305107159 | 0.64601792  |
| 0.310088602 | 0.64601792  |
| 0.213220466 | 0.539391805 |
| 0.331120118 | 0.675746555 |

|             |             |
|-------------|-------------|
| 0.24868316  | 0.598881682 |
| 0.340576264 | 0.675746555 |
| 0.338519733 | 0.675746555 |
| 0.378932288 | 0.728715938 |
| 0.411028337 | 0.755566795 |
| 0.423306598 | 0.766859779 |
| 0.387458964 | 0.733823796 |
| 0.435948884 | 0.769420291 |
| 0.440735516 | 0.769420291 |
| 0.44934145  | 0.769420291 |
| 0.44934145  | 0.769420291 |
| 0.468503564 | 1           |
| 0.465994176 | 1           |
| 0.441462136 | 1           |
| 0.497475571 | 0.829125952 |
| 0.462333948 | 1           |
| 0.443502499 | 1           |
| 0.440593076 | 1           |
| 0.47676815  | 0.805351605 |
| 0.070143472 | 0.438396702 |
| 0.4183481   | 1           |
| 0.343442647 | 1           |
| 0.366601205 | 1           |
| 0.409910317 | 1           |
| 0.295383112 | 1           |
| 0.275399141 | 1           |
| 0.241937981 | 0.92963703  |
| 0.455921896 | 1           |
| 0.299663901 | 1           |
| 0.435509021 | 1           |
| 0.117571714 | 0.565248624 |
| 0.046849725 | 0.366013476 |
| 0.002017532 | 0.043334852 |
| 0.242656985 | 0.92963703  |
| 0.340342735 | 1           |
| 0.357738619 | 1           |

|             |             |
|-------------|-------------|
| 0.245424176 | 0.92963703  |
| 0.002417326 | 0.043334852 |
| 0.102250295 | 0.532553621 |
| 0.184276707 | 0.79429615  |
| 0.080941235 | 0.456969352 |
| 0.013981832 | 0.174772905 |
| 0.033479988 | 0.321922962 |
| 0.056394769 | 0.391630342 |
| 0.127729475 | 0.591340162 |
| 0.108010358 | 0.540051789 |
| 0.000148716 | 0.013052749 |
| 0.065900415 | 0.43355536  |
| 0.006812807 | 0.094622315 |
| 0.000208844 | 0.013052749 |
| 0.053360141 | 0.391630342 |
| 0.001572347 | 0.043334852 |
| 0.001793236 | 0.043334852 |
| 0.040905958 | 0.340882985 |
| 0.073865128 | 0.439673383 |
| 0.002426752 | 0.043334852 |
| 0.037276992 | 0.332830282 |
| 0.015690166 | 0.178297345 |
| 0.191086255 | 0.796192727 |
| 0.084082361 | 0.456969352 |
| 0.023471487 | 0.244494655 |
| 0.005926218 | 0.092597152 |
| 0.132475025 | 0.591406364 |

**P-value**

**FDR**

|             |             |
|-------------|-------------|
| 0.28673035  | 0.5734607   |
| 0.264154893 | 0.5734607   |
| 0.103758397 | 0.5734607   |
| 0.39690158  | 0.595352371 |
| 0.04405553  | 0.264333179 |
| 0.109894657 | 0.32968397  |

| P-value      | FDR          |
|--------------|--------------|
| -2.67272E-12 | -3.20726E-11 |
| 1.28849E-11  | 7.73094E-11  |
| 6.24956E-05  | 0.000249982  |
| 0.078393917  | 0.235181751  |
| 0.292355222  | 0.584710444  |
| 0.210897586  | 0.506154206  |
| 0.334504857  | 0.669009715  |
| 0.151576389  | 0.454729167  |
| 0.009466724  | 0.037866897  |
| 0.1947188    | 0.467325121  |
| 2.37548E-05  | 0.000285058  |
| 0.002599847  | 0.015599081  |

**Supplementary Table S4.** Enrichment and depletion levels within KEGG endocrine system-associated genes

### Germ Layers

| Name     | Enrichment ratio | Observed | Expected    |
|----------|------------------|----------|-------------|
| endoderm | 1.109289222      | 123      | 110.881813  |
| ectoderm | 1.012100519      | 146      | 144.2544464 |
| mesoderm | 0.995807759      | 148      | 148.6230637 |

### Organs

| Name            | Enrichment ratio | Observed | Expected    |
|-----------------|------------------|----------|-------------|
| lymph vessels   | 4.244848258      | 13       | 3.062535858 |
| appendix        | 3.700636943      | 3        | 0.810671256 |
| vas deferens    | 2.988975992      | 14       | 4.683878371 |
| fallopian tube  | 2.697660575      | 13       | 4.818990247 |
| thyroid         | 2.493477298      | 21       | 8.421973609 |
| lymph nodes     | 2.325007503      | 20       | 8.602122777 |
| hypothalamus    | 2.065471782      | 12       | 5.809810671 |
| adrenal gland   | 2.047160862      | 26       | 12.70051635 |
| aorta           | 2.039126479      | 18       | 8.827309237 |
| salivary gland  | 1.995849138      | 16       | 8.01663798  |
| scalp           | 1.978558365      | 18       | 9.097532989 |
| placenta        | 1.883359873      | 19       | 10.08835341 |
| breast          | 1.874348581      | 39       | 20.80722892 |
| nail            | 1.833343073      | 36       | 19.63625932 |
| uterus          | 1.724568672      | 56       | 32.47188755 |
| ovary           | 1.715316694      | 36       | 20.98737808 |
| parathyroid     | 1.707986281      | 5        | 2.927423982 |
| pituitary gland | 1.700060591      | 33       | 19.41107286 |
| sweat gland     | 1.671974522      | 25       | 14.95238095 |
| sinuses         | 1.651523925      | 9        | 5.449512335 |
| abdominal wall  | 1.547158948      | 37       | 23.91480207 |
| cheek           | 1.517839371      | 35       | 23.05909352 |
| bone marrow     | 1.512669115      | 28       | 18.51032702 |
| sternum         | 1.490904092      | 56       | 37.56110155 |
| fibula          | 1.480254777      | 52       | 35.12908778 |
| lips            | 1.469756516      | 56       | 38.10154905 |

|                     |             |    |             |
|---------------------|-------------|----|-------------|
| chest wall          | 1.468207943 | 65 | 44.27165806 |
| scapula             | 1.467088597 | 52 | 35.44434882 |
| tibia               | 1.452325442 | 52 | 35.80464716 |
| anus                | 1.445830247 | 14 | 9.683017785 |
| ulna                | 1.440394795 | 53 | 36.79546758 |
| spleen              | 1.428046621 | 31 | 21.70797476 |
| humerus             | 1.42062366  | 54 | 38.01147447 |
| radius              | 1.414426139 | 53 | 37.47102697 |
| cerebrospinal fluid | 1.407284471 | 18 | 12.79059094 |
| prostate            | 1.399667841 | 22 | 15.71801492 |
| clavicle            | 1.394442906 | 52 | 37.2908778  |
| vulva               | 1.383807582 | 22 | 15.89816408 |
| pancreas            | 1.379654938 | 32 | 23.19420539 |
| rib                 | 1.365076451 | 64 | 46.883821   |
| rib cage            | 1.365076451 | 64 | 46.883821   |
| knee                | 1.360679879 | 66 | 48.50516351 |
| femur               | 1.35675526  | 52 | 38.32673551 |
| intestine           | 1.349150852 | 59 | 43.73121056 |
| shin                | 1.347914118 | 55 | 40.80378657 |
| testis              | 1.340810486 | 50 | 37.2908778  |
| forehead            | 1.33988579  | 49 | 36.57028112 |
| small intestine     | 1.339080408 | 43 | 32.11158921 |
| teeth               | 1.337963428 | 42 | 31.39099254 |
| elbow               | 1.333499299 | 63 | 47.24411933 |
| ankle               | 1.330182864 | 65 | 48.86546185 |
| coagulation system  | 1.327402382 | 44 | 33.14744693 |
| meninges            | 1.326334479 | 27 | 20.356856   |
| wrist               | 1.325915416 | 63 | 47.51434309 |
| chin                | 1.313646014 | 41 | 31.21084337 |
| thigh               | 1.307505558 | 55 | 42.06483075 |
| forearm             | 1.296739584 | 57 | 43.95639702 |
| spinal column       | 1.289766227 | 65 | 50.39672978 |
| hip                 | 1.289254161 | 63 | 48.86546185 |
| large intestine     | 1.282038843 | 47 | 36.66035571 |
| fingers             | 1.280430082 | 88 | 68.72690763 |
| shoulder            | 1.275623506 | 64 | 50.17154332 |

|                   |             |     |             |
|-------------------|-------------|-----|-------------|
| rectum            | 1.274860574 | 24  | 18.82558807 |
| upper limb        | 1.27439153  | 104 | 81.60757315 |
| digit             | 1.260293449 | 89  | 70.6184739  |
| vertebrae         | 1.259195935 | 60  | 47.64945496 |
| hand              | 1.258626982 | 92  | 73.09552496 |
| heart             | 1.253685168 | 83  | 66.20481928 |
| white blood cells | 1.252523273 | 55  | 43.91135972 |
| lower limb        | 1.252225973 | 108 | 86.24641423 |
| toes              | 1.250283038 | 83  | 66.38496845 |
| pelvis            | 1.248084264 | 62  | 49.6761331  |
| hair              | 1.242329798 | 55  | 44.27165806 |
| biliary tract     | 1.23759006  | 17  | 13.73637407 |
| arm               | 1.228669973 | 56  | 45.57773953 |
| neck              | 1.218205285 | 75  | 61.5659782  |
| heart valve       | 1.213625035 | 44  | 36.25502008 |
| foot              | 1.206165546 | 93  | 77.10384395 |
| lung              | 1.200607179 | 81  | 67.46586345 |
| mandible          | 1.198874986 | 73  | 60.89041882 |
| jaw               | 1.190072673 | 73  | 61.34079174 |
| nose              | 1.182911023 | 61  | 51.56769937 |
| maxilla           | 1.181578093 | 72  | 60.93545611 |
| vagina            | 1.181578093 | 24  | 20.3118187  |
| kidney            | 1.17596542  | 59  | 50.17154332 |
| gallbladder       | 1.175496441 | 9   | 7.656339644 |
| mouth             | 1.17317189  | 95  | 80.97705106 |
| penis             | 1.172251454 | 34  | 29.00401606 |
| blood             | 1.171938373 | 93  | 79.35570855 |
| red blood cells   | 1.171558429 | 42  | 35.84968445 |
| duodenum          | 1.168622192 | 10  | 8.557085485 |
| peripheral nerve  | 1.155295068 | 73  | 63.18732071 |
| face              | 1.131404925 | 88  | 77.77940333 |
| stomach           | 1.131237359 | 43  | 38.01147447 |
| blood vessels     | 1.129930838 | 83  | 73.45582329 |
| skin              | 1.125770949 | 112 | 99.48737808 |
| ear               | 1.10851152  | 99  | 89.30895009 |
| liver             | 1.103295486 | 48  | 43.5060241  |

|                           |             |     |             |
|---------------------------|-------------|-----|-------------|
| skull                     | 1.056765705 | 90  | 85.16551922 |
| spinal cord               | 1.01925734  | 51  | 50.03643144 |
| urethra                   | 1.015031847 | 16  | 15.76305221 |
| esophagus                 | 1.013452441 | 33  | 32.56196213 |
| head                      | 1.002331498 | 138 | 137.6790017 |
| brain                     | 0.986836518 | 124 | 125.6540448 |
| bronchus                  | 0.985152497 | 13  | 13.19592656 |
| eyelid                    | 0.979286464 | 49  | 50.03643144 |
| peripheral nervous system | 0.954070462 | 88  | 92.23637407 |
| outer ear                 | 0.923134817 | 38  | 41.16408491 |
| tongue                    | 0.892352171 | 17  | 19.05077453 |
| eye                       | 0.882814916 | 86  | 97.41566265 |
| pharynx                   | 0.836445336 | 22  | 26.30177854 |
| diaphragm                 | 0.816316973 | 10  | 12.25014343 |
| ureter                    | 0.794663091 | 17  | 21.39271371 |
| cranial nerve             | 0.772687162 | 53  | 68.59179575 |
| cerebellum                | 0.770297369 | 40  | 51.92799771 |
| urinary bladder           | 0.759105014 | 16  | 21.07745267 |
| epiglottis                | 0.725615087 | 5   | 6.89070568  |
| trachea                   | 0.685832329 | 8   | 11.66465863 |
| larynx                    | 0.63860549  | 13  | 20.356856   |
| inner ear                 | 0.626720773 | 7   | 11.16924842 |
| vocal cords               | 0.626440109 | 9   | 14.36689616 |
| thymus                    | 0.592101911 | 2   | 3.377796902 |
| middle ear                | 0.505677098 | 11  | 21.75301205 |
| olfactory bulb            | 0.44113553  | 3   | 6.800631096 |
| lacrimal apparatus        | 0.249481142 | 1   | 4.00831899  |

## Body Regions

| Name          | Enrichment ratio | Observed | Expected    |
|---------------|------------------|----------|-------------|
| limbs         | 1.19575917       | 109      | 91.15547906 |
| thorax        | 1.185458275      | 126      | 106.2880092 |
| abdomen       | 1.137241984      | 103      | 90.56999426 |
| pelvis        | 1.13381217       | 96       | 84.67010901 |
| head and neck | 1.012460519      | 144      | 142.2277682 |
| non-specific  | 0.99242766       | 142      | 143.0834768 |



## Body Systems

| Name            | Enrichment ratio | Observed | Expected    |
|-----------------|------------------|----------|-------------|
| endocrine       | 1.584162189      | 62       | 39.13740677 |
| reproductive    | 1.349881597      | 78       | 57.78284567 |
| lymphatic       | 1.320907237      | 42       | 31.79632817 |
| digestive       | 1.15240801       | 101      | 87.64257028 |
| urinary         | 1.143471215      | 67       | 58.59351692 |
| respiratory     | 1.132206203      | 90       | 79.49082042 |
| integumentary   | 1.105787504      | 113      | 102.1896156 |
| skeletal muscle | 1.069619316      | 116      | 108.4497992 |
| cardiovascular  | 1.060354425      | 100      | 94.3080895  |
| skeleton        | 1.024791769      | 105      | 102.4598394 |
| immune          | 1.018942501      | 67       | 65.75444636 |
| nervous         | 1.011307667      | 135      | 133.4905336 |

| P-value     | FDR         |
|-------------|-------------|
| 0.015025109 | 0.045075326 |
| 0.317133552 | 0.475700328 |
| 0.394562318 | 0.98654752  |

| P-value     | FDR         |
|-------------|-------------|
| 1.63064E-05 | 0.001019148 |
| 0.081726352 | 0.118788302 |
| 0.000284661 | 0.003655702 |
| 0.001191358 | 0.007500557 |
| 9.11825E-05 | 0.002849453 |
| 0.000337812 | 0.003838768 |
| 0.013190903 | 0.030534498 |
| 0.000292456 | 0.003655702 |
| 0.002844537 | 0.012260935 |
| 0.0059359   | 0.017147087 |
| 0.003869346 | 0.013284548 |
| 0.005034093 | 0.016134913 |
| 4.64451E-05 | 0.001935214 |
| 0.000154655 | 0.003020093 |
| 6.55835E-06 | 0.000819793 |
| 0.000562759 | 0.00541114  |
| 0.154828223 | 0.210364433 |
| 0.001165991 | 0.007500557 |
| 0.006035774 | 0.017147087 |
| 0.085951336 | 0.123493299 |
| 0.003051835 | 0.012657983 |
| 0.005460262 | 0.016647139 |
| 0.013588698 | 0.030883404 |
| 0.000453367 | 0.004722574 |
| 0.000957753 | 0.007500557 |
| 0.000659078 | 0.005884627 |

|             |             |
|-------------|-------------|
| 0.000181432 | 0.003020093 |
| 0.001184249 | 0.007500557 |
| 0.001500762 | 0.008366611 |
| 0.090622512 | 0.12872516  |
| 0.001606389 | 0.008366611 |
| 0.020243635 | 0.038930068 |
| 0.001970722 | 0.009123713 |
| 0.002446993 | 0.010924077 |
| 0.075266729 | 0.110686366 |
| 0.056078881 | 0.089870002 |
| 0.003746359 | 0.013284548 |
| 0.06187038  | 0.096467633 |
| 0.028540152 | 0.050246747 |
| 0.001741005 | 0.008370215 |
| 0.001741005 | 0.008370215 |
| 0.001526298 | 0.008366611 |
| 0.006699206 | 0.018608904 |
| 0.003932226 | 0.013284548 |
| 0.005850548 | 0.017147087 |
| 0.010110906 | 0.025793127 |
| 0.011135162 | 0.027351217 |
| 0.018188108 | 0.036716476 |
| 0.019905825 | 0.038878565 |
| 0.003568749 | 0.013284548 |
| 0.00313918  | 0.012657983 |
| 0.019436823 | 0.038565125 |
| 0.063703712 | 0.097109318 |
| 0.004122006 | 0.01355923  |
| 0.028310501 | 0.050246747 |
| 0.011159296 | 0.027351217 |
| 0.011381905 | 0.027360349 |
| 0.00689711  | 0.018742148 |
| 0.008168034 | 0.021723495 |
| 0.027958899 | 0.050246747 |
| 0.000968076 | 0.007500557 |
| 0.009723904 | 0.025322668 |

|             |             |
|-------------|-------------|
| 0.107911376 | 0.151560922 |
| 0.000145585 | 0.003020093 |
| 0.001570975 | 0.008366611 |
| 0.017135807 | 0.036304677 |
| 0.001200089 | 0.007500557 |
| 0.003366422 | 0.013150088 |
| 0.02590144  | 0.048323581 |
| 0.000193286 | 0.003020093 |
| 0.003677828 | 0.013284548 |
| 0.018211372 | 0.036716476 |
| 0.030113604 | 0.052280562 |
| 0.183004549 | 0.243357114 |
| 0.034906148 | 0.059403107 |
| 0.014288652 | 0.031268715 |
| 0.073539551 | 0.109433856 |
| 0.005330021 | 0.016647139 |
| 0.014508684 | 0.031268715 |
| 0.023917076 | 0.045297492 |
| 0.028453498 | 0.050246747 |
| 0.05522256  | 0.089647013 |
| 0.035166639 | 0.059403107 |
| 0.191449548 | 0.2519073   |
| 0.066119915 | 0.099578185 |
| 0.306603985 | 0.387126243 |
| 0.011984472 | 0.028265264 |
| 0.153247008 | 0.210364433 |
| 0.014132557 | 0.031268715 |
| 0.122276928 | 0.169829067 |
| 0.303058973 | 0.386554812 |
| 0.054943078 | 0.089647013 |
| 0.050357327 | 0.083928879 |
| 0.175626061 | 0.236056534 |
| 0.062511026 | 0.096467633 |
| 0.01759664  | 0.036659667 |
| 0.057517854 | 0.091009262 |
| 0.209597439 | 0.272913332 |

|             |             |
|-------------|-------------|
| 0.218009443 | 0.280940004 |
| 0.430246408 | 0.53780801  |
| 0.462202064 | 0.566424098 |
| 0.458408707 | 0.566424098 |
| 0.478002974 | 0.580100697 |
| 0.362313959 | 0.999995935 |
| 0.491721539 | 0.999995935 |
| 0.431873854 | 0.999995935 |
| 0.2411967   | 0.999995935 |
| 0.282293574 | 0.999995935 |
| 0.312918287 | 0.999995935 |
| 0.028644577 | 0.809969746 |
| 0.175443685 | 0.999995935 |
| 0.255751596 | 0.999995935 |
| 0.148789614 | 0.999995935 |
| 0.004887963 | 0.30549766  |
| 0.018000992 | 0.750041336 |
| 0.110785339 | 0.999995935 |
| 0.2371779   | 0.999995935 |
| 0.126605808 | 0.999995935 |
| 0.03239879  | 0.809969746 |
| 0.089216978 | 0.999995935 |
| 0.059389183 | 0.927955984 |
| 0.237607629 | 0.999995935 |
| 0.00341005  | 0.30549766  |
| 0.056083039 | 0.927955984 |
| 0.049484169 | 0.927955984 |

| P-value     | FDR         |
|-------------|-------------|
| 0.0016568   | 0.004970401 |
| 0.000243604 | 0.001461623 |
| 0.021090796 | 0.042181592 |
| 0.033635963 | 0.050453944 |
| 0.324881453 | 0.389857744 |
| 0.367116494 | 0.999816345 |

| <b>P-value</b> | <b>FDR</b>  |
|----------------|-------------|
| 2.70254E-05    | 0.000324305 |
| 0.000471271    | 0.002827627 |
| 0.024300234    | 0.072900703 |
| 0.014973092    | 0.059892366 |
| 0.082473037    | 0.141248714 |
| 0.045632745    | 0.09126549  |
| 0.03317094     | 0.079610256 |
| 0.09416581     | 0.141248714 |
| 0.175547603    | 0.23406347  |
| 0.33631207     | 0.403574484 |
| 0.417849373    | 0.417849373 |
| 0.375446258    | 0.409577736 |

**Supplementary Table S4.** Enrichment and depletion levels within KEGG digestive system-associated genes

### Germ Layers

| Name     | Enrichment ratio | Observed | Expected    |
|----------|------------------|----------|-------------|
| endoderm | 1.112510154      | 121      | 108.7630522 |
| ectoderm | 1.00354781       | 142      | 141.497992  |
| mesoderm | 0.987768595      | 144      | 145.7831325 |

### Organs

| Name               | Enrichment ratio | Observed | Expected    |
|--------------------|------------------|----------|-------------|
| parathyroid        | 2.786013986      | 8        | 2.871485944 |
| appendix           | 2.515151515      | 2        | 0.795180723 |
| diaphragm          | 2.496657754      | 30       | 12.01606426 |
| pancreas           | 1.933980583      | 44       | 22.75100402 |
| duodenum           | 1.667942584      | 14       | 8.393574297 |
| small intestine    | 1.619150835      | 51       | 31.49799197 |
| gallbladder        | 1.597860963      | 12       | 7.510040161 |
| red blood cells    | 1.535632709      | 54       | 35.16465863 |
| intestine          | 1.468682708      | 63       | 42.89558233 |
| large intestine    | 1.446057628      | 52       | 35.95983936 |
| kidney             | 1.422392688      | 70       | 49.21285141 |
| biliary tract      | 1.410134128      | 19       | 13.47389558 |
| coagulation system | 1.322504941      | 43       | 32.51405622 |
| tibia              | 1.309777015      | 46       | 35.12048193 |
| femur              | 1.30338639       | 49       | 37.59437751 |
| blood              | 1.284697142      | 100      | 77.83935743 |
| radius             | 1.278736888      | 47       | 36.75502008 |
| fibula             | 1.276923077      | 44       | 34.45783133 |
| blood vessels      | 1.276851903      | 92       | 72.05220884 |
| sternum            | 1.275670373      | 47       | 36.84337349 |
| ulna               | 1.274507622      | 46       | 36.09236948 |
| salivary gland     | 1.271705822      | 10       | 7.863453815 |
| scapula            | 1.265565438      | 44       | 34.76706827 |
| stomach            | 1.260555795      | 47       | 37.28514056 |
| liver              | 1.241953698      | 53       | 42.6746988  |
| ureter             | 1.239043062      | 26       | 20.98393574 |

|                   |             |    |             |
|-------------------|-------------|----|-------------|
| thigh             | 1.236032704 | 51 | 41.26104418 |
| chest wall        | 1.220475354 | 53 | 43.42570281 |
| shin              | 1.199277544 | 48 | 40.02409639 |
| rib               | 1.195965418 | 55 | 45.98795181 |
| rib cage          | 1.195965418 | 55 | 45.98795181 |
| abdominal wall    | 1.193631228 | 28 | 23.45783133 |
| humerus           | 1.180094787 | 44 | 37.28514056 |
| clavicle          | 1.175559947 | 43 | 36.57831325 |
| heart             | 1.170315399 | 76 | 64.93975904 |
| peripheral nerve  | 1.161666559 | 72 | 61.97991968 |
| esophagus         | 1.158430781 | 37 | 31.93975904 |
| aorta             | 1.154916512 | 10 | 8.658634538 |
| forearm           | 1.136456781 | 49 | 43.11646586 |
| trachea           | 1.136188136 | 13 | 11.44176707 |
| vertebrae         | 1.133957725 | 53 | 46.73895582 |
| tongue            | 1.123791103 | 21 | 18.68674699 |
| arm               | 1.118397413 | 50 | 44.70682731 |
| white blood cells | 1.114405594 | 48 | 43.07228916 |
| knee              | 1.113952899 | 53 | 47.57831325 |
| wrist             | 1.094269711 | 51 | 46.6064257  |
| spinal column     | 1.092371436 | 54 | 49.43373494 |
| vas deferens      | 1.088286713 | 5  | 4.59437751  |
| ankle             | 1.084876414 | 52 | 47.93172691 |
| bronchus          | 1.081600993 | 14 | 12.9437751  |
| elbow             | 1.078949649 | 50 | 46.34136546 |
| pelvis            | 1.067172175 | 52 | 48.72690763 |
| hip               | 1.064013406 | 51 | 47.93172691 |
| lower limb        | 1.063849988 | 90 | 84.59839357 |
| upper limb        | 1.061860325 | 85 | 80.04819277 |
| larynx            | 1.051689461 | 21 | 19.96787149 |
| mouth             | 1.044948933 | 83 | 79.42971888 |
| lung              | 1.042662945 | 69 | 66.17670683 |
| epiglottis        | 1.035650624 | 7  | 6.759036145 |
| rectum            | 1.02892562  | 19 | 18.46586345 |
| cheek             | 1.016867898 | 23 | 22.6184739  |
| shoulder          | 1.015994777 | 50 | 49.21285141 |



|                           |             |     |             |
|---------------------------|-------------|-----|-------------|
| lymph vessels             | 0.998663102 | 3   | 3.004016064 |
| ear                       | 0.993123367 | 87  | 87.60240964 |
| head                      | 0.99223838  | 134 | 135.0481928 |
| hand                      | 0.990253739 | 71  | 71.69879518 |
| peripheral nervous system | 0.983709162 | 89  | 90.47389558 |
| foot                      | 0.978440952 | 74  | 75.63052209 |
| neck                      | 0.976990091 | 59  | 60.38955823 |
| thyroid                   | 0.968400583 | 8   | 8.261044177 |
| skin                      | 0.963249516 | 94  | 97.58634538 |
| anus                      | 0.94756871  | 9   | 9.497991968 |
| brain                     | 0.94115347  | 116 | 123.253012  |
| spleen                    | 0.939268201 | 20  | 21.29317269 |
| toes                      | 0.936783027 | 61  | 65.11646586 |
| fingers                   | 0.934528774 | 63  | 67.41365462 |
| digit                     | 0.92393321  | 64  | 69.26907631 |
| mandible                  | 0.920857988 | 55  | 59.72690763 |
| maxilla                   | 0.920177384 | 55  | 59.77108434 |
| urinary bladder           | 0.918997669 | 19  | 20.6746988  |
| chin                      | 0.914600551 | 28  | 30.61445783 |
| jaw                       | 0.914096916 | 55  | 60.1686747  |
| inner ear                 | 0.912756598 | 10  | 10.95582329 |
| eye                       | 0.900012609 | 86  | 95.55421687 |
| heart valve               | 0.899830604 | 32  | 35.562249   |
| sweat gland               | 0.886363636 | 13  | 14.66666667 |
| adrenal gland             | 0.882978723 | 11  | 12.45783133 |
| uterus                    | 0.879082083 | 28  | 31.85140562 |
| cranial nerve             | 0.862054557 | 58  | 67.2811245  |
| fallopian tube            | 0.846219201 | 4   | 4.726907631 |
| nail                      | 0.830692244 | 16  | 19.26104418 |
| face                      | 0.825761962 | 63  | 76.29317269 |
| forehead                  | 0.808441558 | 29  | 35.87148594 |
| placenta                  | 0.808441558 | 8   | 9.895582329 |
| skull                     | 0.802028749 | 67  | 83.53815261 |
| meninges                  | 0.801287208 | 16  | 19.96787149 |
| vocal cords               | 0.780564263 | 11  | 14.09236948 |
| cerebellum                | 0.765670583 | 39  | 50.93574297 |

|                     |             |    |             |
|---------------------|-------------|----|-------------|
| spinal cord         | 0.753866296 | 37 | 49.08032129 |
| lips                | 0.749194068 | 28 | 37.37349398 |
| sinuses             | 0.748309542 | 4  | 5.345381526 |
| teeth               | 0.746967523 | 23 | 30.79116466 |
| pharynx             | 0.736457036 | 19 | 25.79919679 |
| cerebrospinal fluid | 0.717349552 | 9  | 12.54618474 |
| hypothalamus        | 0.701902748 | 4  | 5.698795181 |
| eyelid              | 0.672367237 | 33 | 49.08032129 |
| outer ear           | 0.643922817 | 26 | 40.37751004 |
| ovary               | 0.631486539 | 13 | 20.58634538 |
| bone marrow         | 0.605839416 | 11 | 18.15662651 |
| vagina              | 0.602297924 | 12 | 19.92369478 |
| lymph nodes         | 0.592574964 | 5  | 8.437751004 |
| breast              | 0.587957497 | 12 | 20.40963855 |
| prostate            | 0.583745767 | 9  | 15.41767068 |
| pituitary gland     | 0.577726218 | 11 | 19.04016064 |
| testis              | 0.574110672 | 21 | 36.57831325 |
| nose                | 0.573322747 | 29 | 50.58232932 |
| hair                | 0.552668085 | 24 | 43.42570281 |
| penis               | 0.527244495 | 15 | 28.4497992  |
| urethra             | 0.517402597 | 8  | 15.46184739 |
| vulva               | 0.513005408 | 8  | 15.59437751 |
| middle ear          | 0.468661773 | 10 | 21.3373494  |
| scalp               | 0.448244824 | 4  | 8.923694779 |
| thymus              | 0.301818182 | 1  | 3.313253012 |
| olfactory bulb      | 0.299819386 | 2  | 6.670682731 |
| lacrimal apparatus  | 0.254341164 | 1  | 3.931726908 |

## Body Regions

| Name          | Enrichment ratio | Observed | Expected    |
|---------------|------------------|----------|-------------|
| abdomen       | 1.238189955      | 110      | 88.83935743 |
| thorax        | 1.064676425      | 111      | 104.2570281 |
| limbs         | 1.017741646      | 91       | 89.41365462 |
| non-specific  | 1.004635591      | 141      | 140.3493976 |
| head and neck | 0.996344061      | 139      | 139.5100402 |
| pelvis        | 0.878965184      | 73       | 83.05220884 |

## Body Systems

| Name            | Enrichment ratio | Observed | Expected    |
|-----------------|------------------|----------|-------------|
| cardiovascular  | 1.199921855      | 111      | 92.5060241  |
| digestive       | 1.198122022      | 103      | 85.96787149 |
| urinary         | 1.165746628      | 67       | 57.47389558 |
| immune          | 1.131818182      | 73       | 64.49799197 |
| respiratory     | 0.974710276      | 76       | 77.97188755 |
| nervous         | 0.969911667      | 127      | 130.939759  |
| endocrine       | 0.963803745      | 37       | 38.38955823 |
| integumentary   | 0.937777956      | 94       | 100.2369478 |
| skeletal muscle | 0.902446391      | 96       | 106.37751   |
| lymphatic       | 0.897759464      | 28       | 31.18875502 |
| skeleton        | 0.855704296      | 86       | 100.502008  |
| reproductive    | 0.723375611      | 41       | 56.67871486 |

| P-value     | FDR         |
|-------------|-------------|
| 0.013488876 | 0.040466629 |
| 0.453082144 | 0.679623216 |
| 0.250958001 | 0.752874002 |

| P-value     | FDR         |
|-------------|-------------|
| 0.009951779 | 0.124397231 |
| 0.227374313 | 0.617864981 |
| 1.9946E-06  | 0.000249325 |
| 5.41532E-06 | 0.000338458 |
| 0.036670088 | 0.21827433  |
| 0.000114107 | 0.004754466 |
| 0.064535353 | 0.288104254 |
| 0.000272915 | 0.004873483 |
| 0.000232443 | 0.004842572 |
| 0.001616751 | 0.02245488  |
| 0.000223221 | 0.004842572 |
| 0.067977474 | 0.293006353 |
| 0.021968804 | 0.211238495 |
| 0.020720768 | 0.211238495 |
| 0.018207434 | 0.206902656 |
| 0.00015499  | 0.004842572 |
| 0.028836735 | 0.21827433  |
| 0.03539685  | 0.21827433  |
| 0.000614237 | 0.009597448 |
| 0.02998681  | 0.21827433  |
| 0.032332094 | 0.21827433  |
| 0.224441778 | 0.617864981 |
| 0.040459541 | 0.21988881  |
| 0.036298439 | 0.21827433  |
| 0.033323745 | 0.21827433  |
| 0.123956844 | 0.469533499 |

|             |             |
|-------------|-------------|
| 0.040195661 | 0.21988881  |
| 0.044942336 | 0.234074666 |
| 0.073250196 | 0.30520915  |
| 0.057618737 | 0.266753412 |
| 0.057618737 | 0.266753412 |
| 0.15650418  | 0.533492906 |
| 0.104809423 | 0.42261864  |
| 0.113414846 | 0.443026742 |
| 0.035486643 | 0.21827433  |
| 0.049833336 | 0.249166679 |
| 0.1579139   | 0.533492906 |
| 0.315189383 | 0.729117707 |
| 0.145358537 | 0.519137633 |
| 0.311275975 | 0.729117707 |
| 0.136048192 | 0.500177177 |
| 0.280548042 | 0.692014653 |
| 0.172785405 | 0.553799375 |
| 0.187003651 | 0.578052026 |
| 0.171199231 | 0.553799375 |
| 0.21851494  | 0.617864981 |
| 0.213448064 | 0.617864981 |
| 0.407091778 | 0.87735297  |
| 0.237175283 | 0.630785327 |
| 0.370255598 | 0.826463388 |
| 0.257506474 | 0.670589776 |
| 0.282341978 | 0.692014653 |
| 0.293493257 | 0.705512636 |
| 0.189601065 | 0.578052026 |
| 0.210930647 | 0.617864981 |
| 0.393489504 | 0.862915579 |
| 0.281277747 | 0.692014653 |
| 0.320811791 | 0.729117707 |
| 0.44322618  | 0.908250369 |
| 0.436634537 | 0.908250369 |
| 0.455681923 | 0.918713555 |
| 0.441683375 | 0.908250369 |

|             |             |
|-------------|-------------|
| 0.466589739 | 0.925773292 |
| 0.458867701 | 0.940302666 |
| 0.387057682 | 0.880074525 |
| 0.454886132 | 0.940302666 |
| 0.401313983 | 0.880074525 |
| 0.394586127 | 0.880074525 |
| 0.409649743 | 0.882865826 |
| 0.481596561 | 0.970960808 |
| 0.269134765 | 0.743702641 |
| 0.450374048 | 0.940302666 |
| 0.071034788 | 0.317119591 |
| 0.388649771 | 0.880074525 |
| 0.247560842 | 0.703297847 |
| 0.232959059 | 0.703297847 |
| 0.192340617 | 0.669371508 |
| 0.213447573 | 0.684126836 |
| 0.211296455 | 0.684126836 |
| 0.352207965 | 0.863254816 |
| 0.3003115   | 0.782061199 |
| 0.192530736 | 0.669371508 |
| 0.395498028 | 0.880074525 |
| 0.053853156 | 0.269265778 |
| 0.246672729 | 0.703297847 |
| 0.331306934 | 0.845170751 |
| 0.342880107 | 0.857200267 |
| 0.219872769 | 0.687102403 |
| 0.06148308  | 0.29551897  |
| 0.389920692 | 0.880074525 |
| 0.212821978 | 0.684126836 |
| 0.014299158 | 0.147244537 |
| 0.088904599 | 0.375642867 |
| 0.273682572 | 0.743702641 |
| 0.003245606 | 0.050712588 |
| 0.167176775 | 0.63324536  |
| 0.192778994 | 0.669371508 |
| 0.017064052 | 0.147244537 |

|             |             |
|-------------|-------------|
| 0.015035124 | 0.147244537 |
| 0.033447244 | 0.190555987 |
| 0.290912072 | 0.773702319 |
| 0.051469539 | 0.269265778 |
| 0.063832098 | 0.29551897  |
| 0.143717895 | 0.561398026 |
| 0.242901531 | 0.703297847 |
| 0.001755442 | 0.038539818 |
| 0.002666534 | 0.047616683 |
| 0.028694515 | 0.189754047 |
| 0.028842615 | 0.189754047 |
| 0.021459814 | 0.157792748 |
| 0.104160552 | 0.420002225 |
| 0.016406748 | 0.147244537 |
| 0.033537854 | 0.190555987 |
| 0.017669344 | 0.147244537 |
| 0.00078442  | 0.032684178 |
| 4.09683E-05 | 0.005121032 |
| 9.56701E-05 | 0.005979382 |
| 0.001235061 | 0.038539818 |
| 0.015352811 | 0.147244537 |
| 0.014128865 | 0.147244537 |
| 0.001849911 | 0.038539818 |
| 0.033395787 | 0.190555987 |
| 0.090154288 | 0.375642867 |
| 0.020039038 | 0.156554984 |
| 0.05293857  | 0.269265778 |

**P-value**

**FDR**

|             |             |
|-------------|-------------|
| 0.000213689 | 0.001282135 |
| 0.121170216 | 0.363510648 |
| 0.398295796 | 0.657716147 |
| 0.438477431 | 0.657716147 |
| 0.430241416 | 0.903935967 |
| 0.049004448 | 0.294026687 |

| <b>P-value</b> | <b>FDR</b>  |
|----------------|-------------|
| 0.00094745     | 0.011369402 |
| 0.002544528    | 0.015267167 |
| 0.056516585    | 0.226066342 |
| 0.081955748    | 0.245867244 |
| 0.372922349    | 0.60193986  |
| 0.181676434    | 0.436023442 |
| 0.40129324     | 0.60193986  |
| 0.141543846    | 0.424631537 |
| 0.03421078     | 0.136843118 |
| 0.261159065    | 0.522318131 |
| 0.006806103    | 0.040836617 |
| 0.003234157    | 0.038809888 |



**Supplementary Table S4.** Enrichment and depletion levels within KEGG nervous system-associated genes**Germ Layers**

| Name     | Enrichment ratio | Observed | Expected    |
|----------|------------------|----------|-------------|
| ectoderm | 1.021172281      | 152      | 148.848537  |
| mesoderm | 0.991156004      | 152      | 153.3562823 |
| endoderm | 0.94394801       | 108      | 114.4130809 |

**Organs**

| Name                | Enrichment ratio | Observed | Expected    |
|---------------------|------------------|----------|-------------|
| lymph vessels       | 2.531590414      | 8        | 3.160068847 |
| appendix            | 2.390946502      | 2        | 0.836488812 |
| thyroid             | 2.186373539      | 19       | 8.690189329 |
| parathyroid         | 1.986324786      | 6        | 3.020654045 |
| lymph nodes         | 1.80259841       | 16       | 8.876075731 |
| rectum              | 1.698830409      | 33       | 19.42512909 |
| hypothalamus        | 1.668102211      | 10       | 5.994836489 |
| aorta               | 1.646825397      | 15       | 9.108433735 |
| placenta            | 1.633101852      | 17       | 10.40963855 |
| scalp               | 1.597909791      | 15       | 9.387263339 |
| abdominal wall      | 1.539931645      | 38       | 24.67641997 |
| anus                | 1.50129199       | 15       | 9.991394148 |
| chest wall          | 1.466674202      | 67       | 45.68158348 |
| bone marrow         | 1.308912319      | 25       | 19.09982788 |
| sweat gland         | 1.296296296      | 20       | 15.42857143 |
| cerebrospinal fluid | 1.288080334      | 17       | 13.1979346  |
| nail                | 1.283214407      | 26       | 20.2616179  |
| rib                 | 1.281602448      | 62       | 48.37693632 |
| rib cage            | 1.281602448      | 62       | 48.37693632 |
| diaphragm           | 1.265795207      | 16       | 12.64027539 |
| wrist               | 1.264595401      | 62       | 49.02753873 |
| spinal cord         | 1.258959229      | 65       | 51.62994836 |
| knee                | 1.258743423      | 63       | 50.04991394 |
| stomach             | 1.249297876      | 49       | 39.22203098 |
| sinuses             | 1.244872972      | 7        | 5.623063683 |
| vas deferens        | 1.241452991      | 6        | 4.833046472 |

|                  |             |     |             |
|------------------|-------------|-----|-------------|
| sternum          | 1.238475886 | 48  | 38.75731497 |
| elbow            | 1.230801822 | 60  | 48.74870912 |
| ankle            | 1.22962963  | 62  | 50.42168675 |
| hip              | 1.22962963  | 62  | 50.42168675 |
| uterus           | 1.223660554 | 41  | 33.5060241  |
| adrenal gland    | 1.220908852 | 16  | 13.10499139 |
| fibula           | 1.213865147 | 44  | 36.24784854 |
| femur            | 1.213735475 | 48  | 39.54733219 |
| lower limb       | 1.213577023 | 108 | 88.99311532 |
| pelvis           | 1.209563144 | 62  | 51.25817556 |
| fallopian tube   | 1.206645898 | 6   | 4.972461274 |
| spleen           | 1.205394191 | 27  | 22.39931153 |
| scapula          | 1.20306838  | 44  | 36.57314974 |
| thigh            | 1.198033151 | 52  | 43.40447504 |
| peripheral nerve | 1.196325335 | 78  | 65.19965577 |
| tibia            | 1.190962031 | 44  | 36.94492255 |
| esophagus        | 1.190512781 | 40  | 33.5989673  |
| upper limb       | 1.18755621  | 100 | 84.20654045 |
| shoulder         | 1.178303079 | 61  | 51.76936317 |
| heart valve      | 1.176167472 | 44  | 37.40963855 |
| clavicle         | 1.169484702 | 45  | 38.47848537 |
| forehead         | 1.166028097 | 44  | 37.73493976 |
| vertebrae        | 1.15931527  | 57  | 49.16695353 |
| ulna             | 1.158892062 | 44  | 37.96729776 |
| chin             | 1.148896371 | 37  | 32.20481928 |
| humerus          | 1.147314376 | 45  | 39.22203098 |
| foot             | 1.143799758 | 91  | 79.55938038 |
| meninges         | 1.142576205 | 24  | 21.00516351 |
| pharynx          | 1.142250127 | 31  | 27.1394148  |
| shin             | 1.140053961 | 48  | 42.10327022 |
| radius           | 1.137998575 | 44  | 38.66437177 |
| large intestine  | 1.136727637 | 43  | 37.82788296 |
| spinal column    | 1.134577831 | 59  | 52.00172117 |
| intestine        | 1.130220849 | 51  | 45.12392427 |
| fingers          | 1.128100578 | 80  | 70.91566265 |
| digit            | 1.125330688 | 82  | 72.86746988 |

|                           |             |     |             |
|---------------------------|-------------|-----|-------------|
| epiglottis                | 1.125151295 | 8   | 7.110154905 |
| forearm                   | 1.124430783 | 51  | 45.35628227 |
| lips                      | 1.119166448 | 44  | 39.31497418 |
| hand                      | 1.113712604 | 84  | 75.42340792 |
| white blood cells         | 1.10351377  | 50  | 45.30981067 |
| bronchus                  | 1.101630641 | 15  | 13.616179   |
| pituitary gland           | 1.098393057 | 22  | 20.0292599  |
| cheek                     | 1.092737269 | 26  | 23.79345955 |
| lung                      | 1.091727241 | 76  | 69.61445783 |
| teeth                     | 1.080556884 | 35  | 32.39070568 |
| toes                      | 1.080305543 | 74  | 68.49913941 |
| cerebellum                | 1.063794931 | 57  | 53.58175559 |
| heart                     | 1.053968254 | 72  | 68.31325301 |
| blood                     | 1.050279564 | 86  | 81.88296041 |
| head                      | 1.03474721  | 147 | 142.0636833 |
| maxilla                   | 1.03377953  | 65  | 62.87607573 |
| brain                     | 1.033505907 | 134 | 129.6557659 |
| mouth                     | 1.029250608 | 86  | 83.55593804 |
| jaw                       | 1.026948387 | 65  | 63.29432014 |
| neck                      | 1.023192175 | 65  | 63.52667814 |
| face                      | 1.021724678 | 82  | 80.25645439 |
| arm                       | 1.020641195 | 48  | 47.0292599  |
| mandible                  | 1.018628096 | 64  | 62.82960413 |
| tongue                    | 1.017424043 | 20  | 19.65748709 |
| nose                      | 1.014847162 | 54  | 53.20998279 |
| peripheral nervous system | 1.008680556 | 96  | 95.17383821 |
| coagulation system        | 0.994061997 | 34  | 34.20309811 |
| urethra                   | 0.983703704 | 16  | 16.26506024 |
| skull                     | 0.978631725 | 86  | 87.8777969  |
| blood vessels             | 0.976315371 | 74  | 75.79518072 |
| cranial nerve             | 0.974903334 | 69  | 70.77624785 |
| lacrimal apparatus        | 0.967124428 | 4   | 4.135972461 |
| salivary gland            | 0.967124428 | 8   | 8.271944923 |
| vocal cords               | 0.944386393 | 14  | 14.82444062 |
| skin                      | 0.935164227 | 96  | 102.6557659 |
| breast                    | 0.931537598 | 20  | 21.46987952 |

|                 |             |    |             |
|-----------------|-------------|----|-------------|
| hair            | 0.919407709 | 42 | 45.68158348 |
| trachea         | 0.913913914 | 11 | 12.03614458 |
| ear             | 0.911525747 | 84 | 92.15318417 |
| red blood cells | 0.892099386 | 33 | 36.99139415 |
| eyelid          | 0.890955762 | 46 | 51.62994836 |
| kidney          | 0.88855642  | 46 | 51.76936317 |
| eye             | 0.885412921 | 89 | 100.5180723 |
| pancreas        | 0.877454153 | 21 | 23.93287435 |
| outer ear       | 0.847556528 | 36 | 42.47504303 |
| small intestine | 0.81486676  | 27 | 33.13425129 |
| larynx          | 0.809324812 | 17 | 21.00516351 |
| duodenum        | 0.792787524 | 7  | 8.829604131 |
| inner ear       | 0.780913978 | 9  | 11.52495697 |
| ovary           | 0.738833254 | 16 | 21.65576592 |
| testis          | 0.72767937  | 28 | 38.47848537 |
| ureter          | 0.724834308 | 16 | 22.07401033 |
| prostate        | 0.678234108 | 11 | 16.21858864 |
| liver           | 0.646001074 | 29 | 44.89156627 |
| biliary tract   | 0.634972678 | 9  | 14.17383821 |
| vulva           | 0.60958976  | 10 | 16.40447504 |
| penis           | 0.601449275 | 18 | 29.92771084 |
| urinary bladder | 0.597736626 | 13 | 21.74870912 |
| thymus          | 0.57382716  | 2  | 3.485370052 |
| gallbladder     | 0.506318083 | 4  | 7.900172117 |
| vagina          | 0.477129014 | 10 | 20.95869191 |
| olfactory bulb  | 0.427520235 | 3  | 7.017211704 |
| middle ear      | 0.400966184 | 9  | 22.44578313 |

## Body Regions

| Name          | Enrichment ratio | Observed | Expected    |
|---------------|------------------|----------|-------------|
| limbs         | 1.19074806       | 112      | 94.05851979 |
| thorax        | 1.094161959      | 120      | 109.6729776 |
| head and neck | 1.02209556       | 150      | 146.757315  |
| non-specific  | 0.961797176      | 142      | 147.6402754 |
| abdomen       | 0.952336225      | 89       | 93.45438898 |
| pelvis        | 0.950019701      | 83       | 87.36660929 |

## Body Systems

| Name            | Enrichment ratio | Observed | Expected    |
|-----------------|------------------|----------|-------------|
| lymphatic       | 1.06678208       | 35       | 32.80895009 |
| skeletal muscle | 1.036606374      | 116      | 111.9036145 |
| respiratory     | 1.036302592      | 85       | 82.02237522 |
| nervous         | 1.023654221      | 141      | 137.7418244 |
| skeleton        | 0.993162393      | 105      | 105.7228916 |
| endocrine       | 0.94097089       | 38       | 40.383821   |
| digestive       | 0.939914735      | 85       | 90.43373494 |
| immune          | 0.928538813      | 63       | 67.84853701 |
| integumentary   | 0.910435336      | 96       | 105.444062  |
| reproductive    | 0.85537369       | 51       | 59.62306368 |
| urinary         | 0.826999174      | 50       | 60.4595525  |
| cardiovascular  | 0.822101949      | 80       | 97.31153184 |

| P-value     | FDR         |
|-------------|-------------|
| 0.190112316 | 0.570336949 |
| 0.303790845 | 0.455686267 |
| 0.130099575 | 0.390298724 |

| P-value     | FDR         |
|-------------|-------------|
| 0.015869015 | 0.152586685 |
| 0.234914042 | 0.444912958 |
| 0.000994129 | 0.037484364 |
| 0.08124872  | 0.289286603 |
| 0.01430979  | 0.152586685 |
| 0.0011995   | 0.037484364 |
| 0.069833657 | 0.286411598 |
| 0.034302257 | 0.212211047 |
| 0.027023614 | 0.194925852 |
| 0.042457875 | 0.230749318 |
| 0.002937932 | 0.073448305 |
| 0.064715708 | 0.286411598 |
| 0.000150004 | 0.018750542 |
| 0.081903358 | 0.289286603 |
| 0.117969528 | 0.325622912 |
| 0.145016972 | 0.355433755 |
| 0.092265183 | 0.295721741 |
| 0.010534288 | 0.152586685 |
| 0.010534288 | 0.152586685 |
| 0.168921423 | 0.364054792 |
| 0.014185664 | 0.152586685 |
| 0.012831571 | 0.152586685 |
| 0.014707635 | 0.152586685 |
| 0.038570031 | 0.219147903 |
| 0.281261967 | 0.495179519 |
| 0.298259003 | 0.51300018  |

|             |             |
|-------------|-------------|
| 0.046523547 | 0.242310142 |
| 0.028069323 | 0.194925852 |
| 0.025678973 | 0.194925852 |
| 0.025678973 | 0.194925852 |
| 0.075612662 | 0.286411598 |
| 0.205289545 | 0.398585163 |
| 0.074107654 | 0.286411598 |
| 0.06292283  | 0.286411598 |
| 0.001151685 | 0.037484364 |
| 0.035651456 | 0.212211047 |
| 0.318945519 | 0.524581445 |
| 0.150082809 | 0.35555123  |
| 0.083314542 | 0.289286603 |
| 0.064988072 | 0.286411598 |
| 0.020145046 | 0.179866481 |
| 0.094805588 | 0.296267461 |
| 0.109106667 | 0.325622912 |
| 0.006049642 | 0.126034203 |
| 0.060477694 | 0.286411598 |
| 0.110670037 | 0.325622912 |
| 0.115100618 | 0.325622912 |
| 0.122790699 | 0.326571008 |
| 0.090600015 | 0.295721741 |
| 0.131967174 | 0.343664517 |
| 0.172302942 | 0.365048605 |
| 0.144499797 | 0.355433755 |
| 0.03508514  | 0.212211047 |
| 0.23998802  | 0.447738843 |
| 0.207264285 | 0.398585163 |
| 0.144998691 | 0.355433755 |
| 0.162102928 | 0.361836893 |
| 0.167703718 | 0.364054792 |
| 0.118893729 | 0.325622912 |
| 0.150753722 | 0.35555123  |
| 0.074089547 | 0.286411598 |
| 0.073472608 | 0.286411598 |

|             |             |
|-------------|-------------|
| 0.357529829 | 0.565711755 |
| 0.160640836 | 0.361836893 |
| 0.193716751 | 0.396960555 |
| 0.086970901 | 0.293820611 |
| 0.203790461 | 0.398585163 |
| 0.340219755 | 0.552304797 |
| 0.313467416 | 0.522445694 |
| 0.306997124 | 0.518576222 |
| 0.153660701 | 0.355696067 |
| 0.299592105 | 0.51300018  |
| 0.18881505  | 0.393364688 |
| 0.280879009 | 0.495179519 |
| 0.276334337 | 0.495179519 |
| 0.257114179 | 0.472636359 |
| 0.119829231 | 0.325622912 |
| 0.363060713 | 0.567282364 |
| 0.197920262 | 0.398585163 |
| 0.349260097 | 0.559711694 |
| 0.388876254 | 0.595787845 |
| 0.403424817 | 0.607567495 |
| 0.390836826 | 0.595787845 |
| 0.428461753 | 0.630090813 |
| 0.422252716 | 0.628352256 |
| 0.456260189 | 0.64809686  |
| 0.443413824 | 0.644220819 |
| 0.44837769  | 0.644220819 |
| 0.490905679 | 0.999881409 |
| 0.484592848 | 0.999881409 |
| 0.380554669 | 0.999881409 |
| 0.387060928 | 0.999881409 |
| 0.388111633 | 0.999881409 |
| 0.494194877 | 0.694093929 |
| 0.480053947 | 0.999881409 |
| 0.422519761 | 0.999881409 |
| 0.134289042 | 0.932562794 |
| 0.373294548 | 0.999881409 |



|             |             |
|-------------|-------------|
| 0.258222945 | 0.999881409 |
| 0.390164373 | 0.999881409 |
| 0.093706887 | 0.780890723 |
| 0.225152439 | 0.999881409 |
| 0.166522466 | 0.999881409 |
| 0.160662312 | 0.999881409 |
| 0.029362442 | 0.524329326 |
| 0.258770479 | 0.999881409 |
| 0.117926755 | 0.867108492 |
| 0.109825568 | 0.858012248 |
| 0.17085925  | 0.999881409 |
| 0.270710083 | 0.999881409 |
| 0.221949738 | 0.999881409 |
| 0.08825344  | 0.780890723 |
| 0.021543374 | 0.448820286 |
| 0.074188537 | 0.744188786 |
| 0.077395634 | 0.744188786 |
| 0.001577994 | 0.098624612 |
| 0.06578278  | 0.744188786 |
| 0.038607906 | 0.603248533 |
| 0.004893164 | 0.152911372 |
| 0.015631818 | 0.390795458 |
| 0.221209214 | 0.999881409 |
| 0.066375798 | 0.744188786 |
| 0.002439999 | 0.101666607 |
| 0.048057964 | 0.667471718 |
| 0.000314277 | 0.039284687 |

| P-value     | FDR         |
|-------------|-------------|
| 0.001809383 | 0.010856299 |
| 0.038976146 | 0.116928439 |
| 0.198118411 | 0.396236821 |
| 0.061878672 | 0.371272034 |
| 0.234329044 | 0.481829877 |
| 0.240914938 | 0.481829877 |

| <b>P-value</b> | <b>FDR</b>  |
|----------------|-------------|
| 0.328930388    | 0.986791163 |
| 0.24333802     | 0.986791163 |
| 0.318476921    | 0.986791163 |
| 0.241003136    | 0.986791163 |
| 0.44856726     | 0.67285089  |
| 0.333605615    | 0.57189534  |
| 0.189953252    | 0.431606673 |
| 0.215803337    | 0.431606673 |
| 0.057246067    | 0.224119088 |
| 0.074706363    | 0.224119088 |
| 0.040151054    | 0.224119088 |
| 0.00248057     | 0.029766838 |
